# Supplementary material
Source: PubMed Central journal article supplement (PMC7415675)
Supplement: NIHMS1584245-supplement-1.pdf [file NIHMS1584245-supplement-1.pdf]

**Table 1. Summary of Potential Mathematical Models for the Decline of Residual RPE in CHM**

|                                                  | <b>Area Linear Model</b>                                                          | <b>Radius Linear Model</b>                                                         | <b>Area Exponential Model</b>                                                       |
|--------------------------------------------------|-----------------------------------------------------------------------------------|------------------------------------------------------------------------------------|-------------------------------------------------------------------------------------|
| Definition                                       | The area of residual RPE declines linearly as a function of time.                 | The effective radius of residual RPE declines linearly as a function of time.      | The area of residual RPE declines exponentially as a function of time.              |
| Mathematical expression                          | $A \propto -T$                                                                    | $R \propto -T$                                                                     | $A \propto e^{-T} \xrightarrow{\text{yields}} \log A \propto -T$                    |
| Corresponding outcome measures                   | The decline rate of area of residual RPE                                          | The decline rate of effective radius of residual RPE                               | The decline rate of log-transformed area of residual RPE                            |
| Expected residual RPE area as a function of time | 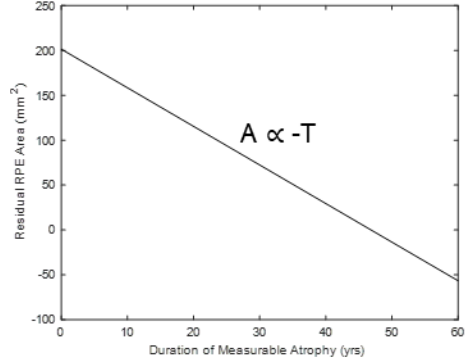 |  |  |

Abbreviations: A, lesion area; CHM, choroideremia; R, lesion radius; RPE, retinal pigment epithelium; log A, logarithm-transformed lesion area.
