# Supplementary material
Source: PubMed Central journal article supplement (PMC7415675)
Supplement: NIHMS1584245-supplement-3.pdf [file NIHMS1584245-supplement-3.pdf]

**Table 3. Included Studies in Cross-sectional Data Analysis**

| Study                                                                                                                                        | Study type     | Diagnostic method of CHM | No. of eyes (patients) in study-level data | No. of eyes (patients) in individual-level data | Age at baseline (years)* | Baseline residual RPE area (mm <sup>2</sup> )* | Data extraction methods                                                                                                                                |
|----------------------------------------------------------------------------------------------------------------------------------------------|----------------|--------------------------|--------------------------------------------|-------------------------------------------------|--------------------------|------------------------------------------------|--------------------------------------------------------------------------------------------------------------------------------------------------------|
| Dimopoulos et al, 2018 <sup>1</sup><br>University of Alberta                                                                                 | Observational  | Genetics                 | 60 (30)                                    | 60 (30)                                         | 41.3 ± 14.0              | 6.86 ± 10.68                                   | Data were extracted from the text and Table 1 in Dimopoulos et al, 2018.                                                                               |
| Dysli et al, 2016 <sup>2</sup><br>Measurement of Retinal Autofluorescence with a Fluorescence Lifetime Imaging Ophthalmoscope<br>NCT01981148 | Observational  | Clinical <sup>†</sup>    | 16 (8)                                     | 16 (8)                                          | 54.5 ± 12.9              | 4.60 ± 8.14                                    | Data were extracted from the text and Table 1 in Dysli et al, 2016.                                                                                    |
| Fischer et al, 2018 <sup>3</sup><br>THOR Study<br>NCT02671539                                                                                | Interventional | Genetics                 | 6 (6)                                      | 6 (6)                                           | 54.3 ± 4.1               | 8.57 ± 10.0                                    | Data were extracted from the text and Table 2 in Fischer et al, 2018.                                                                                  |
| Jain et al, 2016 <sup>4</sup><br>Oregon Health and Science University                                                                        | Observational  | Genetics                 | 11 (6)                                     | 11 (6)                                          | 29.2 ± 16.1              | 18.56 ± 11.04                                  | Data were extracted from the text and Table in Jain et al, 2018. The ages of individual patients were obtained from the author of the original paper.  |
| Jolly et al, 2016 <sup>5</sup><br>Screening Process for Gene Therapy for Blindness Caused by Choroideremia<br>NCT01461213                    | Observational  | Genetics                 | 100 (50)                                   | 100 (50)                                        | 41.7 ± 14.8              | 14.8 ± 19.3                                    | Data were extracted from the text and Figure 2 and 3 (DataThief III software for extracting individual-level data in the figure) in Jolly et al, 2016. |
| Seitz et al, 2015 <sup>6</sup><br>University Eye Hospital Tübingen                                                                           | Observational  | Clinical <sup>†</sup>    | 58 (29)                                    | 58 (29)                                         | 42.5 ± 14.5              | 8.47 ± 7.42                                    | Data were extracted from the text and Figure 2 and 3 (DataThief III software for extracting individual-level data in the figure) in Seitz et al, 2015. |

CHM = Choroideremia; RPE = retinal pigment epithelium; THOR = Tübingen Choroideremia Gene Therapy Trial.

\* Data reported as mean ± standard deviation

<sup>†</sup> Genetic confirmation of CHM was performed in some but not all patients.

#### References:

1. Dimopoulos IS, Freund PR, Knowles JA, MacDonald IM. The natural history of full-field stimulus threshold decline in choroideremia. *Retina* 2018;38(9):1731-42.
2. Dysli C, Wolf S, Tran HV, Zinkernagel MS. Autofluorescence lifetimes in patients with choroideremia identify photoreceptors in areas with retinal pigment epithelium atrophy. *Invest Ophthalmol Vis Sci* 2016;57(15):6714-21.
3. Fischer MD, Ochakovski GA, Beier B, et al. Changes in retinal sensitivity after gene therapy in choroideremia. *Retina* 2018.
4. Jain N, Jia Y, Gao SS, et al. Optical coherence tomography angiography in choroideremia: correlating choriocapillaris loss with overlying degeneration. *JAMA Ophthalmol* 2016;134(6):697-702.
5. Jolly JK, Edwards TL, Moules J, et al. A qualitative and quantitative assessment of fundus autofluorescence patterns in patients with choroideremia. *Invest Ophthalmol Vis Sci* 2016;57(10):4498-503.
6. Seitz IP, Zhou A, Kohl S, et al. Multimodal assessment of choroideremia patients defines pre-treatment characteristics. *Graefes Arch Clin Exp Ophthalmol* 2015;253(12):2143-50.
