# Supplementary material
Source: PubMed Central journal article supplement (PMC7415675)
Supplement: NIHMS1584245-supplement-4.pdf [file NIHMS1584245-supplement-4.pdf]

**Table 4. Included Studies in Longitudinal Data Analysis**

| Study                                                                                                                        | Study type     | Diagnostic method of CHM | No. of eyes (patients) in study-level data | No. of eyes (patients) in individual-level data | Age at baseline (years) | Baseline residual RPE area (mm <sup>2</sup> ) | Mean follow-up duration (years) | Data extraction methods                                                                                                                                                                                    |
|------------------------------------------------------------------------------------------------------------------------------|----------------|--------------------------|--------------------------------------------|-------------------------------------------------|-------------------------|-----------------------------------------------|---------------------------------|------------------------------------------------------------------------------------------------------------------------------------------------------------------------------------------------------------|
| Aylward et al, 2018 <sup>1</sup><br>Screening Process for Gene Therapy Trials<br>NCT01461213 and<br>NCT02407678              | Observational  | Clinical <sup>†</sup>    | 29 (29)                                    | 29 (29)                                         | 28.3 ± 9.1              | 27.91 ± 34.73                                 | 1.9                             | Data were extracted from the text, supplementary Table and Figure 1 (DataThief III software for extracting individual-level data in the figure) in Aylward et al, 2018.                                    |
| Dimopoulos et al, 2018 <sup>2</sup><br>An Open Label Clinical Trial of Retinal Gene Therapy for Choroideremia<br>NCT02077361 | Interventional | Genetics                 | 6 (6)                                      | 6 (6)                                           | 34.3 ± 5.0              | 4.54 ± 4.79                                   | 2                               | Data were extracted from the text, Table 1 and Figure 2 (DataThief III software for extracting individual-level data in the figure) in Jolly et al, 2016.                                                  |
| Fischer et al, 2018 <sup>3</sup><br>THOR Study<br>NCT02671539                                                                | Interventional | Genetics                 | 6 (6)                                      | 6 (6)                                           | 54.3 ± 4.1              | 8.57 ± 10.0                                   | 1                               | Data were extracted from the text and Table 2 in Fischer et al, 2018.                                                                                                                                      |
| Seitz et al, 2015 <sup>4</sup><br>University Eye Hospital Tübingen                                                           | Observational  | Clinical <sup>†</sup>    | 15 (8)                                     | 15 (8)                                          | 43.1 ± 13.8             | 8.87 ± 6.41                                   | 4.7                             | Data were extracted from the text in Seitz et al, 2015. Longitudinal data of individual patients were obtained from the author of the original paper.                                                      |
| Xue et al, 2018 <sup>5</sup><br>Gene Therapy for Blindness Caused by Choroideremia<br>NCT01461213                            | Interventional | Genetics                 | 12 (12)                                    | 12 (12)                                         | 47.8 ± 12.4             | 5.05 ± 3.99                                   | 3.5                             | Data were extracted from the text, supplementary Table 1, supplementary Table 4, and supplementary Figure 5 (DataThief III software for extracting individual-level data in the figure) in Xue et al, 2018 |

CHM = Choroideremia; RPE = retinal pigment epithelium; THOR = Tübingen Choroideremia Gene Therapy Trial.

\* Data reported as mean ± standard deviation

† Genetic confirmation of CHM was performed in some but not all patients.

**References:**

1. Aylward JW, Xue K, Patricio MI, et al. Retinal degeneration in choroideremia follows an exponential decay function. *Ophthalmology* 2018;125(7):1122-4.
2. Dimopoulos IS, Hoang SC, Radziwon A, et al. Two-year results after aav2-mediated gene therapy for choroideremia: the alberta experience. *Am J Ophthalmol* 2018;193:130-42.
3. Fischer MD, Ochakovski GA, Beier B, et al. Changes in retinal sensitivity after gene therapy in choroideremia. *Retina* 2018.
4. Seitz IP, Zhour A, Kohl S, et al. Multimodal assessment of choroideremia patients defines pre-treatment characteristics. *Graefes Arch Clin Exp Ophthalmol* 2015;253(12):2143-50.
5. Xue K, Jolly JK, Barnard AR, et al. Beneficial effects on vision in patients undergoing retinal gene therapy for choroideremia. *Nat Med* 2018;24(10):1507-12.
