# Supplementary material
Source: PubMed Central journal article supplement (PMC7415675)
Supplement: NIHMS1584245-supplement-6.pdf [file NIHMS1584245-supplement-6.pdf]

**Table 6. List of Excluded Studies and Reason for Exclusion**

| <b>Study</b>                              | <b>Reasons for exclusion *</b>     |
|-------------------------------------------|------------------------------------|
| Abbouda et al, 2017 <sup>1</sup>          | No available individual-level data |
| Alabduljalil et al, 2015 <sup>2</sup>     | Conference abstract                |
| Aleman et al, 2017 <sup>3</sup>           | RPE area not assessed by FAF       |
| Aleman et al, 2018 <sup>4</sup>           | Conference abstract                |
| Al-Qahtani et al, 2018 <sup>5</sup>       | No necessary data                  |
| Bains et al, 2003 <sup>6</sup>            | Conference abstract                |
| Batmanabane et al, 2017 <sup>7</sup>      | Conference abstract                |
| Birtel et al, 2019 <sup>8</sup>           | Overlapping dataset                |
| Camino et al, 2018 <sup>9</sup>           | No necessary data                  |
| Chung et al, 2014 <sup>10</sup>           | Conference abstract                |
| Cideciyan et al, 2015 <sup>11</sup>       | No necessary data                  |
| Colucci et al, 2016 <sup>12</sup>         | Conference abstract                |
| Coussa et al, 2012 <sup>13</sup>          | Overlapping dataset                |
| Cunningham et al, 2018 <sup>14</sup>      | Conference abstract                |
| Di Iorio et al, 2019 <sup>15</sup>        | No necessary data                  |
| Dimopoulos et al, 2015 <sup>16</sup>      | Conference abstract                |
| Dimopoulos et al, 2016 <sup>17</sup>      | Overlapping dataset                |
| Dimopoulos et al, 2017 <sup>18</sup>      | Conference abstract                |
| Duncan et al, 2002 <sup>19</sup>          | No necessary data                  |
| Edwards et al, 2016 <sup>20</sup>         | Conference abstract                |
| Esposito et al, 2011 <sup>21</sup>        | Overlapping dataset                |
| Forsius et al, 1977 <sup>22</sup>         | No necessary data                  |
| Freund et al, 2013 <sup>23</sup>          | Conference abstract                |
| Freund et al, 2016 <sup>24</sup>          | No necessary data                  |
| Fry et al, 2018 <sup>25</sup>             | Conference abstract                |
| Fujiki et al, 1999 <sup>26</sup>          | No necessary data                  |
| Genead et al, 2011 <sup>27</sup>          | Overlapping dataset                |
| Genead et al, 2011 <sup>28</sup>          | Conference abstract                |
| Genead et al, 2011 <sup>29</sup>          | No necessary data                  |
| Gocho et al, 2017 <sup>30</sup>           | Conference abstract                |
| Groppe et al, 2013 <sup>31</sup>          | Conference abstract                |
| Grover et al, 1998 <sup>32</sup>          | Overlapping dataset                |
| Halioua-Haubold et al, 2019 <sup>33</sup> | Overlapping dataset                |
| Han et al, 2017 <sup>34</sup>             | Overlapping dataset                |
| Han et al, 2018 <sup>35</sup>             | Overlapping dataset                |
| Han et al, 2018 <sup>36</sup>             | No necessary data                  |
| Hariri et al, 2017 <sup>37</sup>          | No necessary data                  |
| Hariri et al, 2018 <sup>38</sup>          | Conference abstract                |
| Hariri et al, 2019 <sup>39</sup>          | No necessary data                  |
| Hayakawa et al, 1999 <sup>40</sup>        | No necessary data                  |
| Heon et al, 2016 <sup>41</sup>            | No necessary data                  |
| Hirakawa et al, 1999 <sup>42</sup>        | Less than 5 patients               |
| Jolly et al, 2015 <sup>43</sup>           | Overlapping dataset                |
| Jolly et al, 2016 <sup>44</sup>           | Conference abstract                |
| Jolly et al, 2017 <sup>45</sup>           | No necessary data                  |
| Karna et al, 1986 <sup>46</sup>           | No necessary data                  |
| Katz et al, 2006 <sup>47</sup>            | Less than 5 patients               |
| Khan et al, 2016 <sup>48</sup>            | No necessary data                  |
| Kurstjens et al, 1965 <sup>49</sup>       | No necessary data                  |
| Lam et al, 2017 <sup>50</sup>             | Conference abstract                |
| Lam et al, 2018 <sup>51</sup>             | Conference abstract                |
| Lam et al, 2019 <sup>52</sup>             | No necessary data                  |
| Lazow et al, 2011 <sup>53</sup>           | Conference abstract                |
| Lazow et al, 2011 <sup>54</sup>           | No necessary data                  |
| Li et al, 2014 <sup>55</sup>              | No necessary data                  |
| MacDonald et al, 1996 <sup>56</sup>       | Conference abstract                |
| MacDonald et al, 2016 <sup>57</sup>       | Conference abstract                |

|                                           |                      |
|-------------------------------------------|----------------------|
| MacLaren et al, 2014 <sup>58</sup>        | Conference abstract  |
| MacLaren et al, 2014 <sup>59</sup>        | Overlapping dataset  |
| MacLaren et al, 2016 <sup>60</sup>        | Conference abstract  |
| MacLaren et al, 2018 <sup>61</sup>        | Conference abstract  |
| Moosajee et al, 2014 <sup>62</sup>        | Conference abstract  |
| Morgan et al, 2014 <sup>63</sup>          | No necessary data    |
| Morgan et al, 2018 <sup>64</sup>          | Conference abstract  |
| Murro et al, 2019 <sup>65</sup>           | Overlapping dataset  |
| Mysore et al, 2013 <sup>66</sup>          | Conference abstract  |
| Patricio et al, 2017 <sup>67</sup>        | Conference abstract  |
| Pennesi et al, 2018 <sup>68</sup>         | Conference abstract  |
| Pichi et al, 2013 <sup>69</sup>           | Overlapping dataset  |
| Prokofyeva et al, 2009 <sup>70</sup>      | No necessary data    |
| Prokofyeva et al, 2010 <sup>71</sup>      | Conference abstract  |
| Renner et al, 2006 <sup>72</sup>          | No necessary data    |
| Roberts et al, 2002 <sup>73</sup>         | No necessary data    |
| Salveti et al, 2017 <sup>74</sup>         | Conference abstract  |
| Sandberg et al, 2006 <sup>75</sup>        | No necessary data    |
| Seitz et al, 2018 <sup>76</sup>           | Overlapping dataset  |
| Simunovic et al, 2016 <sup>77</sup>       | Overlapping dataset  |
| Simunovic et al, 2017 <sup>78</sup>       | Overlapping dataset  |
| Skorczyk-Werner et al, 2018 <sup>79</sup> | No necessary data    |
| Spandau et al, 2002 <sup>80</sup>         | Less than 5 patients |
| Sun et al, 2016 <sup>81</sup>             | No necessary data    |
| Traband et al, 2016 <sup>82</sup>         | Conference abstract  |
| Tuten et al, 2019 <sup>83</sup>           | Overlapping dataset  |
| van Schuppen et al, 2018 <sup>84</sup>    | No necessary data    |
| Wang et al, 2018 <sup>85</sup>            | No necessary data    |
| Wilson et al, 2018 <sup>86</sup>          | Conference abstract  |
| Xue et al, 2016 <sup>87</sup>             | Overlapping dataset  |
| Xue et al, 2016 <sup>88</sup>             | Conference abstract  |
| Yeoh et al, 2010 <sup>89</sup>            | Less than 5 patients |
| Zeitz et al, 2016 <sup>90</sup>           | Conference abstract  |
| Zhao et al, 2002 <sup>91</sup>            | Conference abstract  |
| Zinkernagel et al, 2013 <sup>92</sup>     | Less than 5 patients |

FAF = fundus autofluorescence; RPE = retinal pigment epithelium.

\* “No necessary data” represents studies did not report necessary data for the present meta-analysis, including the area of residual retinal pigment epithelium measured by fundus autofluorescence, and the ages of individual patients.

#### References:

1. Abbouda A, Lim WS, Sprogyte L, et al. Quantitative and qualitative features of spectral-domain optical coherence tomography provide prognostic indicators for visual acuity in patients with choroideremia. *Ophthalmic Surg Lasers Imaging Retina* 2017;48(9):711-6.
2. Alabduljalil T, Araya MPP, Trang H, et al. Phenotypic characteristics and natural history of choroideremia. *2015;56 (7):3838.*
3. Aleman TS, Han G, Serrano LW, et al. Natural history of the central structural abnormalities in choroideremia: A prospective cross-sectional study. *Ophthalmology* 2017;124(3):359-73.
4. Aleman TS, Silson EH, Willett A, et al. Fmri derived visual field measures correlate highly with clinical perimetry assessments in choroideremia patients. *Mol Ther* 2018;26(5):415-.
5. Al-Qahtani AA, Ba-Ali S, Alabduljalil T, et al. Scleral pits in choroideremia: Implications for retinal gene therapy. *Retina* 2018;38(9):1725-30.
6. Bains HS, Jampol LM. Characterization of posterior pole chorioretinal features using optical coherence tomography in patients with diffuse and focal chorioretinal atrophy. *Invest Ophthalmol Vis Sci* 2003;44:U680-U.

7. Batmanabane V, Vincent A, Heon E. Retinal sensitivity and fixation stability as surrogate markers of visual function in molecularly confirmed choroideremia patients. *Invest Ophthalmol Vis Sci* 2017;58(8).
8. Birtel J, Salvetti AP, Jolly JK, et al. Near-infrared autofluorescence in choroideremia: Anatomic and functional correlations. *Am J Ophthalmol* 2019;199:19-27.
9. Camino A, Wang Z, Wang J, et al. Deep learning for the segmentation of preserved photoreceptors on en face optical coherence tomography in two inherited retinal diseases. *Biomed Opt Express* 2018;9(7):3092-105.
10. Chung DC, Morgan JIW, Charlson ES, et al. Structural findings in carriers and affected individuals with choroideremia - an optical coherence tomography study. *Invest Ophthalmol Vis Sci* 2014;55(13):3383.
11. Cideciyan AV, Swider M, Jacobson SG. Autofluorescence imaging with near-infrared excitation: Normalization by reflectance to reduce signal from choroidal fluorophores. *Invest Ophthalmol Vis Sci* 2015;56(5):3393-406.
12. Colucci R, Boccia R, Di Iorio V, et al. Clinical presentation and disease course in choroideremia patients. *Invest Ophthalmol Vis Sci* 2016;57(12):159.
13. Coussa RG, Kim J, Traboulsi EI. Choroideremia: Effect of age on visual acuity in patients and female carriers. *Ophthalmic Genet* 2012;33(2):66-73.
14. Cunningham C, Daggett H, Stone E, Han I. Scleral pits are a sign of disease severity in choroideremia. *Invest Ophthalmol Vis Sci* 2018;59(9):6059.
15. Di Iorio V, Esposito G, De Falco F, et al. Chm/rep1 transcript expression and loss of visual function in patients affected by choroideremia. *Invest Ophthalmol Vis Sci* 2019;60(5):1547-55.
16. Dimopoulos I, MacDonald IM. Mesopic and scotopic threshold sensitivity in patients with choroideremia: Relationship with residual fundus autofluorescence area. *Invest Ophthalmol Vis Sci* 2015;56(7):2223.
17. Dimopoulos IS, Tseng C, MacDonald IM. Microperimetry as an outcome measure in choroideremia trials: Reproducibility and beyond. *Invest Ophthalmol Vis Sci* 2016;57(10):4151-61.
18. Dimopoulos IS, Knowles J, Sajed T, MacDonald IM. Fundus autofluorescence analysis of the transition zone in choroideremia: Outcomes following gene therapy. *Invest Ophthalmol Vis Sci* 2017;58(8).
19. Duncan JL, Aleman TS, Gardner LM, et al. Macular pigment and lutein supplementation in choroideremia. *Exp Eye Res* 2002;74(3):371-81.
20. Edwards T, Jolly J, Groppe M, et al. 2. Sustained improvement in visual acuity after retinal gene therapy for choroideremia. 2016;44 (Supplement 1):22.
21. Esposito G, De Falco F, Tinto N, et al. Comprehensive mutation analysis (20 families) of the choroideremia gene reveals a missense variant that prevents the binding of rep1 with rab geranylgeranyl transferase. *Hum Mutat* 2011;32(12):1460-9.
22. Forsius H, Hyvarinen L, Nieminen H, Flower R. Fluorescein and indocyanine green fluorescence angiography in study of affected males and in female carriers with choroideremia. A preliminary report. *Acta Ophthalmol (Copenh)* 1977;55(3):459-70.
23. Freund P, Furgoch M, MacDonald I. Genotype-phenotype analysis of male subjects affected by choroideremia. *Invest Ophthalmol Vis Sci* 2013;54(15):1567.
24. Freund PR, Sergeev YV, MacDonald IM. Analysis of a large choroideremia dataset does not suggest a preference for inclusion of certain genotypes in future trials of gene therapy. *Mol Genet Genomic Med* 2016;4(3):344-58.
25. Fry L, Patricio MI, Williams J, et al. Pathological donor splice site mutations beyond the dinucleotide canonical sequence in choroideremia. 2018;59(9):3493.
26. Fujiki K, Hotta Y, Hayakawa M, et al. Rep-1 gene mutations in Japanese patients with choroideremia. *Graefes Arch Clin Exp Ophthalmol* 1999;237(9):735-40.
27. Genead MA, McAnany JJ, Fishman GA. Retinal nerve fiber thickness measurements in choroideremia patients with spectral-domain optical coherence tomography. *Ophthalmic Genet* 2011;32(2):101-6.
28. Genead MA, Fishman GA. Presence and treatment of cystoid macular edema in patients with choroideremia. 2011;2011:2130.
29. Genead MA, Fishman GA. Cystic macular oedema on spectral-domain optical coherence tomography in choroideremia patients without cystic changes on fundus examination. 2011;25(1):84-90.
30. Gocho K, Akeo K, Kubota D, et al. High resolution imaging analysis of female carriers and patients of choroideremia with chm gene mutation. *Invest Ophthalmol Vis Sci* 2017;58(8).
31. Groppe M, Cottrill C, Downes S, MacLaren R. Correlation of retinal sensitivity with the area of normal autofluorescence in choroideremia patients. *Invest Ophthalmol Vis Sci* 2013;54(15):642.

32. Grover S, Alexander KR, Choi DM, Fishman GA. Intraocular light scatter in patients with choroideremia. *Ophthalmology* 1998;105(9):1641-5.
33. Halioua-Haubold CL, Jolly JK, Smith JA, et al. Potential lifetime quality of life benefits of choroideremia gene therapy: Projections from a clinically informed decision model. *Eye (Lond)* 2019.
34. Han RC, Jolly JK, Xue K, MacLaren RE. Effects of pupil dilation on maia microperimetry. *Clin Exp Ophthalmol* 2017;45(5):489-95.
35. Han RC, Gray JM, Han J, et al. Optimisation of dark adaptation time required for mesopic microperimetry. *Br J Ophthalmol* 2018;29:29.
36. Han X, Li H, Wu S, et al. Study of natural history of chinese patients with choroideremia. [chinese]. 2018;36(7):519-25.
37. Hariri AH, Velaga SB, Girach A, et al. Measurement and reproducibility of preserved ellipsoid zone area and preserved retinal pigment epithelium area in eyes with choroideremia. *Am J Ophthalmol* 2017;179:110-7.
38. Hariri AH, Girach A, Ip MS, et al. Spatial distribution of preserved autofluorescence in patients with choroideremia. 2018;59(9):4991.
39. Hariri AH, Ip MS, Girach A, et al. Macular spatial distribution of preserved autofluorescence in patients with choroideremia. *Br J Ophthalmol* 2019;103(7):933-7.
40. Hayakawa M, Fujiki K, Hotta Y, et al. Visual impairment and rep-1 gene mutations in japanese choroideremia patients. *Ophthalmic Genet* 1999;20(2):107-15.
41. Heon E, Alabduljalil T, McGuigan ID, et al. Visual function and central retinal structure in choroideremia. *Invest Ophthalmol Vis Sci* 2016;57(9):OCT377-87.
42. Hirakawa H, Iijima H, Gohdo T, et al. Progression of defects in the central 10-degree visual field of patients with retinitis pigmentosa and choroideremia. *Am J Ophthalmol* 1999;127(4):436-42.
43. Jolly JK, Groppe M, Birks J, et al. Functional defects in color vision in patients with choroideremia. *Am J Ophthalmol* 2015;160(4):822-31 e3.
44. Jolly JK, Cottrill CL, Groppe M, MacLaren RE. Characterisation of scotopic vision in patients with choroideremia utilising full-field stimulus threshold (fst). *Invest Ophthalmol Vis Sci* 2016;57(12):621.
45. Jolly JK, Xue K, Edwards TL, et al. Characterizing the natural history of visual function in choroideremia using microperimetry and multimodal retinal imaging. *Invest Ophthalmol Vis Sci* 2017;58(12):5575-83.
46. Karna J. Choroideremia. A clinical and genetic study of 84 finnish patients and 126 female carriers. *Acta Ophthalmol Suppl* 1986;176:1-68.
47. Katz BJ, Yang Z, Payne M, et al. Fundus appearance of choroideremia using optical coherence tomography. *Adv Exp Med Biol* 2006;572:57-61.
48. Khan KN, Islam F, Moore AT, Michaelides M. Clinical and genetic features of choroideremia in childhood. *Ophthalmology* 2016;123(10):2158-65.
49. Kurstjens JH. Choroideremia and gyrate atrophy of the choroid and retina. *Doc Ophthalmol* 1965;19(1):2-122.
50. Lam BL, Verriotto J, Gregori N, Davis JL. Choroideremia gene therapy phase ii clinical trial: 6-month results. *Invest Ophthalmol Vis Sci* 2017;58(8).
51. Lam BL, Fischer MD, Pennesi ME, et al. Natural history of progression of choroideremia (night) study: Cross-sectional analysis of baseline characteristics. 2018;59(9):3899.
52. Lam BL, Davis JL, Gregori NZ, et al. Choroideremia gene therapy phase 2 clinical trial: 24-month results. 2019;197:65-73.
53. Lazow MA, Hood DC, Birch DG. Fdoct analysis of the transition zone between healthy and severely affected regions in patients with choroideremia. 2011;2011:4976.
54. Lazow MA, Hood DC, Ramachandran R, et al. Transition zones between healthy and diseased retina in choroideremia (chm) and stargardt disease (stgd) as compared to retinitis pigmentosa (rp). *Invest Ophthalmol Vis Sci* 2011;52(13):9581-90.
55. Li S, Guan L, Fang S, et al. Exome sequencing reveals chm mutations in six families with atypical choroideremia initially diagnosed as retinitis pigmentosa. 2014;34(2):573-7.
56. MacDonald IM, Chen M, Mitchell G, et al. Mutation analysis of canadian families with choroideremia. *Invest Ophthalmol Vis Sci* 1996;37(3):5237-.
57. MacDonald IM, Dimopoulos I, Chan S, et al. Ocular gene therapy for choroideremia: The alberta experience. *Invest Ophthalmol Vis Sci* 2016;57(12).

58. MacLaren RE, Groppe M, Barnard AR, et al. Improved visual function in patients with choroideremia undergoing subretinal gene therapy. 2014;55 (13):832.
59. MacLaren RE, Groppe M, Barnard AR, et al. Retinal gene therapy in patients with choroideremia: Initial findings from a phase 1/2 clinical trial. *Lancet* 2014;383(9923):1129-37.
60. MacLaren RE, Edwards TL, Jolly J, et al. Long term vision results following retinal gene therapy for choroideremia. 2016;57(12).
61. MacLaren RE, Xue KM, Barnard AR, et al. Retinal gene therapy for choroideremia in a multicenter dose escalation phase i/ii clinical trial. *Invest Ophthalmol Vis Sci* 2018;59(9).
62. Moosajee M, Ramsden SC, Black GC, et al. Spectrum of chm mutations, structural retinal features and their progression in choroideremia patients within the uk. *Invest Ophthalmol Vis Sci* 2014;55(13):2136.
63. Morgan JI, Han G, Klinman E, et al. High-resolution adaptive optics retinal imaging of cellular structure in choroideremia. *Invest Ophthalmol Vis Sci* 2014;55(10):6381-97.
64. Morgan JI, Tuten WS, Cooper RF, et al. Cellular-scale assessment of visual function in choroideremia. *Invest Ophthalmol Vis Sci* 2018;59(9):1151.
65. Murro V, Mucciolo DP, Giorgio D, et al. Optical coherence tomography angiography (oct-a) in young choroideremia (chm) patients. 2019;40(3):201-6.
66. Mysore N, Cao S, Koenekoop J, et al. Choroideremia is a systemic disease with retinal crystals, lymphocyte crystals and serum lipid abnormalities. 2013;54(15):716.
67. Patricio MI, Barnard AR, Orlans HO, et al. Inclusion of the woodchuck hepatitis virus posttranscriptional regulatory element enhances aav2-driven transduction of mouse and human retina. *Mol Ther Nucleic Acids* 2017;6:198-208.
68. Pennesi ME, Lam BL, Fischer MD, et al. The natural history of the progression of choroideremia (night) study: Longitudinal changes in visual acuity over 12 months. 2018;59(9):3898.
69. Pichi F, Morara M, Veronese C, et al. Multimodal imaging in hereditary retinal diseases. *J Ophthalmol* 2013;2013:634351.
70. Prokofyeva E, Wilke R, Lotz G, et al. An epidemiological approach for the estimation of disease onset in central europe in central and peripheral monogenic retinal dystrophies. *Graefes Arch Clin Exp Ophthalmol* 2009;247(7):885-94.
71. Prokofyeva E, Troeger E, Wilke R, Zrenner E. Age of visual symptoms onset in different types of inherited retinal degenerations. 2010;51(13):3548.
72. Renner AB, Kellner U, Cropp E, et al. Choroideremia: Variability of clinical and electrophysiological characteristics and first report of a negative electroretinogram. 2006;113(11):2066-73.
73. Roberts MF, Fishman GA, Roberts DK, et al. Retrospective, longitudinal, and cross sectional study of visual acuity impairment in choroideraemia. *Br J Ophthalmol* 2002;86(6):658-62.
74. Salvetti AP, Birtel J, Xue K, et al. Near-infrared autofluorescence in choroideremia: Anatomical and functional correlations. 2017;58(8).
75. Sandberg MA, Gaudio AR. Reading speed of patients with advanced retinitis pigmentosa or choroideremia. *Retina* 2006;26(1):80-8.
76. Seitz IP, Jolly JK, Dominik Fischer M, Simunovic MP. Colour discrimination ellipses in choroideremia. *Graefes Arch Clin Exp Ophthalmol* 2018;256(4):665-73.
77. Simunovic MP, Jolly JK, Xue K, et al. The spectrum of chm gene mutations in choroideremia and their relationship to clinical phenotype. *Invest Ophthalmol Vis Sci* 2016;57(14):6033-9.
78. Simunovic MP, Xue K, Jolly JK, MacLaren RE. Structural and functional recovery following limited iatrogenic macular detachment for retinal gene therapy. *JAMA Ophthalmol* 2017;135(3):234-41.
79. Skorczyk-Werner A, Wawrocka A, Kochalska N, Krawczynski MR. Novel chm mutations in polish patients with choroideremia - an orphan disease with close perspective of treatment. *Orphanet J Rare Dis* 2018;13(1):221.
80. Spandau UH, Wechsler S, Blankenagel A. Testing night vision goggles in a dark outside environment. *Optom Vis Sci* 2002;79(1):39-45.
81. Sun LW, Johnson RD, Williams V, et al. Multimodal imaging of photoreceptor structure in choroideremia. *PLoS One* 2016;11(12):e0167526.
82. Traband A, Fuerst N, Serrano L, et al. Natural history of the central structural abnormalities in choroideremia: Insights from a cross-sectional study. 2016;57(12):6587.
83. Tuten WS, Vergilio GK, Young GJ, et al. Visual function at the atrophic border in choroideremia assessed with adaptive optics microperimetry. 2019;08:08.

84. van Schuppen SM, Talib M, Bergen AA, et al. Long-term follow-up of patients with choroideremia with scleral pits and tunnels as a novel observation. *Retina* 2018;38(9):1713-24.
85. Wang Z, Camino A, Hagag AM, et al. Automated detection of preserved photoreceptor on optical coherence tomography in choroideremia based on machine learning. *J Biophotonics* 2018;11(5):e201700313.
86. Wilson IR, Jolly J, Downes S, MacLaren RE. Beyond the average threshold: Alternatives in the analysis of microperimetry data. 2018;59(9):1698.
87. Xue K, Oldani M, Jolly JK, et al. Correlation of optical coherence tomography and autofluorescence in the outer retina and choroid of patients with choroideremia. *Invest Ophthalmol Vis Sci* 2016;57(8):3674-84.
88. Xue K, Oldani M, Jolly J, et al. Rpe degeneration precedes photoreceptor and choroidal loss in choroideremia based on enhanced-depth oct and fundus autofluorescence correlations. 2016;57(12).
89. Yeoh J, Rahman W, Chen F, et al. Choroidal imaging in inherited retinal disease using the technique of enhanced depth imaging optical coherence tomography. 2010;248(12):1719-28.
90. Zeitz C, Kloeckener-Gruissem B, Lancelot M-E, et al. A comprehensive molecular analysis of patients with the diagnosis of choroideremia. 2016;57(12):661.
91. Zhao D, Wintch SW, Gellermann W, Bernstein PS. Resonance raman spectroscopic measurement of macular carotenoid pigments in patients with choroidal and retinal dystrophies. 2002;2002:2544.
92. Zinkernagel MS, Groppe M, MacLaren RE. Macular hole surgery in patients with end-stage choroideremia. *Ophthalmology* 2013;120(8):1592-6.
