# Supplementary material
Source: PubMed Central journal article supplement (PMC7415675)
Supplement: NIHMS1584245-supplement-8.pdf [file NIHMS1584245-supplement-8.pdf]

**Table 8. Literature Search Strategy for Ovid MEDLINE****Ovid MEDLINE(R) ALL <1946 to July 17, 2019>**

| #  | Searches                                                                     | Results |
|----|------------------------------------------------------------------------------|---------|
| 1  | Choroideremia/                                                               | 319     |
| 2  | (choroideremia* or choroideraemia*).tw,kw.                                   | 506     |
| 3  | (chm and (gen* or retina* or eye* or vision)).tw,kw.                         | 520     |
| 4  | ((tapetochoroid* adj2 dystroph*) or (tapeto-choroid* adj2 dystroph*)).tw,kw. | 7       |
| 5  | choroidal sclerosis.tw,kw.                                                   | 43      |
| 6  | or/1-5                                                                       | 921     |
| 7  | Visual Acuity/                                                               | 71031   |
| 8  | (vis* adj2 acuity).tw,kw.                                                    | 60639   |
| 9  | bcva.tw,kw.                                                                  | 6191    |
| 10 | (logmar or log mar or logarithm*).tw,kw.                                     | 31561   |
| 11 | snellen.tw,kw.                                                               | 3966    |
| 12 | (EDTRS or Early Treatment Diabetic Retinopathy Study).tw,kw.                 | 1458    |
| 13 | bailey lovie.tw,kw.                                                          | 99      |
| 14 | or/7-13                                                                      | 120080  |
| 15 | Retinal Pigment Epithelium/                                                  | 5158    |
| 16 | retinal pigment epithelium.tw,kw.                                            | 11691   |
| 17 | "Pigment Epithelium of Eye"/                                                 | 9405    |
| 18 | Retina/                                                                      | 71464   |
| 19 | 17 and 18                                                                    | 2184    |
| 20 | fundus autofluorescence.tw,kw.                                               | 1782    |
| 21 | Fundus oculi/                                                                | 15865   |
| 22 | Tomography, Optical Coherence/                                               | 29477   |
| 23 | (RPE or FAF or OCT).tw,kw.                                                   | 44832   |
| 24 | 15 or 16 or 19 or 20 or 21 or 22 or 23                                       | 64654   |
| 25 | 14 or 24                                                                     | 167631  |
| 28 | 6 and 25                                                                     | 255     |
